# Supplementary material
Source: PubMed Central journal article supplement (PMC8815511)
Supplement: KID.0004052020SupplementaryData.pdf [file KID.0004052020SupplementaryData.pdf]

## Supplementary Material

Supplementary Appendix 1: Database Search Strategies

## Ovid Embase Search Strategy

Embase Classic+Embase 1947 onward

- 1 renal replacement therapy/ or exp continuous renal replacement therapy/ or extended daily dialysis/ or hemodiafiltration/ or exp hemodialysis/ or hemofiltration/ or exp peritoneal dialysis/
- 2 hemodialysis patient/
- 3 dialysis.ti,ab,kw.
- 4 hemodialysis.ti,ab,kw.
- 5 renal replacement.ti,ab,kw.
- 6 haemodialysis.ti,ab,kw.
- 7 1 or 2 or 3 or 4 or 5 or 6
- 8 education program/
- 9 health program/ or exp program evaluation/
- 10 health education/ or patient education/ or "outcome of education"/
- 11 transitional care/
- 12 (transition\* adj4 (dialysis or hemodialysis or haemodialysis or end stage or ESRD or kidney or renal)).ti,ab,kw.
- 13 (program or programs).ab,kw,ti.
- 14 programme\*.ab,kw,ti.
- 15 educat\*.ti,ab,kw.
- 16 disease management/ or case management/ or catheter care/ or patient care planning/
- 17 case management.ab,kw,ti.
- 18 patient monitoring/ or home monitoring/ or self monitoring/
- 19 exp self care/
- 20 (self adj (manag\* or monitor\*)).ab,kw,ti.
- 21 (patient adj2 (monitor\* or planning or manag\*)).ab,kw,ti.
- 22 psychosocial care/
- 23 (psychosocial adj2 (care or support\*)).mp.
- 24 or/8-23
- 25 new.ab,kw,ti.
- 26 newly.ab,kw,ti.
- 27 start.ab,kw,ti.
- 28 starting.ab,kw,ti.
- 29 starts.ti,ab,kw.
- 30 begin.ab,kw,ti.
- 31 beginning.ab,kw,ti.
- 32 early.ab,kw,ti.
- 33 earlier.ab,kw,ti.
- 34 outset.ab,kw,ti.
- 35 transition\*.ti,ab,kw.
- 36 commenc\*.ti,ab,kw.
- 37 inception.ti,ab,kw.
- 38 initiate.ti,ab,kw.
- 39 initiated.ti,ab,kw.
- 40 initiating.ti,ab,kw.
- 41 initiation.ti,ab,kw.
- 42 (onset adj3 (hemodialysis or haemodialysis or dialysis)).mp.
- 43 or/25-42

- 44 7 and 24 and 43
- 45 (predialysis or pre-dialysis).ti,ab,kw.
- 46 (prehemodialysis or pre-hemodialysis).ti,ab,kw.
- 47 (prehaemodialysis or pre-haemodialysis).ti,ab,kw.
- 48 (incident adj3 (dialysis or hemodialysis or haemodialysis or end stage or ESRD or kidney or renal)).ti,ab,kw.
- 49 or/45-48
- 50 24 and 49
- 51 44 or 50
- 52 limit 51 to child
- 53 limit 52 to (adult <18 to 64 years> or aged <65+ years>)
- 54 51 not (52 not 53)
- 55 limit 54 to ("book review" or conference abstract or editorial or note or patent or "review")
- 56 54 not 55
- 57 remove duplicates from 56

### **Ovid MEDLINE Search Strategy**

Ovid MEDLINE(R), Ovid MEDLINE(R) Daily and Epub Ahead of Print, In-Process & Other Non-Indexed Citations 1946 to Present

- 1 renal replacement therapy/ or renal dialysis/ or hemodiafiltration/ or hemodialysis, home/ or peritoneal dialysis/ or peritoneal dialysis, continuous ambulatory/
- 2 dialysis.ti,ab,kw.
- 3 hemodialysis.ti,ab,kw.
- 4 haemodialysis.ti,ab,kw.
- 5 renal replacement.ti,ab,kw.
- 6 1 or 2 or 3 or 4 or 5
- 7 education/ or education, nonprofessional/ or exp health education/ or health promotion/
- 8 Patient Education as Topic/
- 9 Program Evaluation/
- 10 disease management/
- 11 patient care management/ or patient care planning/ or case management/
- 12 self care/ or self administration/ or self medication/
- 13 "continuity of patient care"/ or transitional care/
- 14 psychosocial support systems/
- 15 (transition\* adj4 (dialysis or hemodialysis or haemodialysis or end stage or ESRD or kidney or renal)).ti,ab,kw.
- 16 (program or programs).ab,kw,ti.
- 17 programme\*.ab,kw,ti.
- 18 educat\*.ti,ab,kw.
- 19 case management.ab,kw,ti.
- 20 (self adj (manag\* or monitor\*)).ab,kw,ti.
- 21 (patient adj2 (monitor\* or planning or manag\*)).ab,kw,ti.
- 22 (psychosocial adj2 (care or support\*)).mp.
- 23 7 or 8 or 9 or 10 or 11 or 12 or 13 or 14 or 15 or 16 or 17 or 18 or 19 or 20 or 21 or 22
- 24 (new or newly or start or starting or starts or begin or beginning or early or earlier or outset or transition\* or commenc\* or inception or initiat\*).ab,kw,ti.

25 (onset adj3 (hemodialysis or haemodialysis or dialysis)).mp.  
26 24 or 25  
27 6 and 23 and 26  
28 (predialysis or pre-dialysis).ti,ab,kw.  
29 (prehemodialysis or pre-hemodialysis).ti,ab,kw.  
30 (prehaemodialysis or pre-haemodialysis).ti,ab,kw.  
31 (incident adj3 (dialysis or hemodialysis or haemodialysis or end stage or ESRD or kidney or renal)).ti,ab,kw.  
32 28 or 29 or 30 or 31  
33 23 and 32  
34 27 or 33  
35 limit 34 to "all child (0 to 18 years)"  
36 limit 35 to "all adult (19 plus years)"  
37 34 not (35 not 36)  
38 limit 37 to (clinical conference or comment or congresses or editorial or news or newspaper article or "review")  
39 37 not 38
